# Supplementary material for: Lianhua Qingwen Capsules Reduced the Rate of Severity in Patients with COVID-19: A System Review and Meta-Analysis of Randomized Controlled Trials
Source: Evid Based Complement Alternat Med. 2022 Feb 2;2022:9617429. doi: 10.1155/2022/9617429 (PMC8812377; doi:10.1155/2022/9617429)
Supplement: Supplementary Materials — Figure 1. Ultra-performance liquid chromatography (UPLC) analysis of Lianhuaqingwen. (A) Fingerprint of Lianhuaqingwen (upper panel) and analysis of chemical standards (lower panel). (B) Chemical structures of identified compounds in Lianhuaqingwen, corresponding to the common peak numbers. Table 1. Formulation of Lianhuaqingwen capsule (Granule) [1, 2]. [file 9617429.f1.zip]

Archive with 2 entries (2 files):
- 9617429.f1/Supplementary Figure 1 Chemical analysis of Lianhua qingwen.docx
- 9617429.f1/Supplementary Table 1  Formulation of Lianhua qingwen capsule(Granule).docx
